# Supplementary material for: Serum AGE/RAGEs as potential biomarker in idiopathic pulmonary fibrosis
Source: Springer Nature journal article supplement (doi:10.1186/s12931-018-0924-7), 2018-11-08

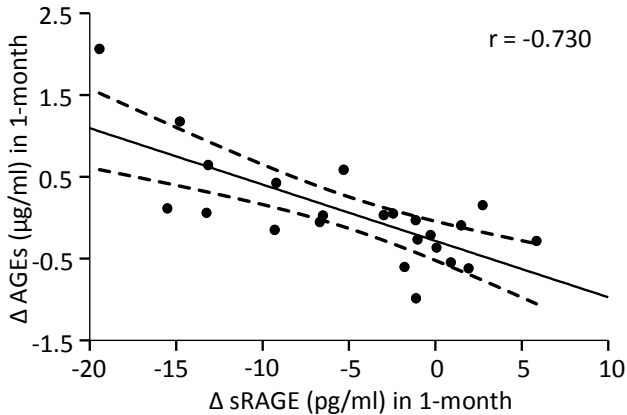

Supplement: MOESM3 [file 16259870]
