# Supplementary material for: Serum AGE/RAGEs as potential biomarker in idiopathic pulmonary fibrosis
Source: Respir Res. 2018 Nov 8;19:215. doi: 10.1186/s12931-018-0924-7 (PMC6225674; doi:10.1186/s12931-018-0924-7)
Supplement: Supplementary file 1 — ROC statistics for sRAGE and AGE serum levels. AGE: advanced glycation end-product, AUC: area under the curve, cHP: chronic hypersensitivity pneumonitis, fNSIP: fibrotic non-specific interstitial pneumonia, CI: confidence interval, IPF: idiopathic pulmonary fibrosis, sRAGE: soluble receptor for advanced glycation end-products, ROC: Receiver operating characteristic. (*) p-value < 0.05, (**) p-value < 0.01. (XLSX 9 kb) [file 12931_2018_924_MOESM1_ESM.xlsx]

## Sheet: Full1
	ROC	variables	AUC	95 % CI	p-value
	IPF – cHP	sRAGE	0.383	0.230-0.536	0.176
		AGE	0.507	0.333-0.681	0.936
		Ratio	0.713	0.569-0.856	0.014*
	IPF – fNSIP	sRAGE	0.801	0.672-0.930	0.000**
		AGE	0.879	0.793-0.965	0.000**
		Ratio	0.987	0.959-1.000	0.000**
	cHP – fNSIP	sRAGE	0.887	0.771-1.000	0.000**
		AGE	0.883	0.771-0.996	0.000**
		Ratio	0.882	0.766-0.998	0.000**
