# Supplementary material for: Serum AGE/RAGEs as potential biomarker in idiopathic pulmonary fibrosis
Source: Respir Res. 2018 Nov 8;19:215. doi: 10.1186/s12931-018-0924-7 (PMC6225674; doi:10.1186/s12931-018-0924-7)
Supplement: Supplementary file 2 — Correlation between RAGE, AGE and PFT. AGE: advanced glycation end-product, cHP: chronic hypersensitivity pneumonitis, DLCO: diffusing capacity for carbon monoxide, fNSIP: fibrotic non-specific interstitial pneumonia, FVC: forced vital capacity, IPF: idiopathic pulmonary fibrosis, r: correlation coefficient, R2: coefficient of determination, sRAGE: soluble receptor for advanced glycation end-products, TLC: Total lung capacity. (*) p-value < 0.05, (**) p-value < 0.01. (XLSX 9 kb) [file 12931_2018_924_MOESM2_ESM.xlsx]

## Sheet: Full1
	Correlations	Groups	r	R2	p-value
	sRAGE – AGES	IPF	-0.541	0.293	0.000**
		cHP	-0.496	0.246	0.031*
		fNSIP	-0.291	0.085	0.213
	sRAGE – FVC	IPF	0.447	0.199	0.002**
		cHP	0.471	0.222	0.031*
		fNSIP	0.517	0.268	0.020*
	sRAGE – DLCO	IPF	0.466	0.217	0.001**
		cHP	0.464	0.173	0.039*
		fNSIP	0.586	0.343	0.008**
	sRAGE – TLC	IPF	0.315	0.099	0.026*
		cHP	0.661	0.438	0.001**
		fNSIP	0.629	0.396	0.004**
